# Supplementary material
Source: MDPI journal article supplement (https://www.mdpi.com/2073-4395/13/10/2606)
Supplement: s1 [file s1]

# Significance of Phosphate Nano-Fertilizers Foliar Application: A Brief Real-Field Study of Quantitative, Physiological Parameters, and Agro-Ecological Diversity in Sunflower

Dávid Ernst <sup>1</sup>, Marek Kolencík <sup>1\*</sup>, Martin Šebesta <sup>2</sup>, Euba Ďurišová <sup>3</sup>, Samuel Kšíňan <sup>3</sup>, Lenka Tomovičová <sup>3</sup>, Nikola Kotlárová <sup>3</sup>, Mária Kalúzová <sup>3</sup>, Ivan Černý <sup>1</sup>, Gabriela Kratošová <sup>4</sup>, Veronika Žitniak Čurná <sup>1</sup>, Jana Ivanič Porhajašová <sup>3</sup>, Mária Babošová <sup>3</sup>, Edmund Dobročka <sup>5</sup>, Yu Qian <sup>6</sup>, Sasikumar Swamiappan <sup>7</sup>, Ramakanth Illa <sup>8</sup>, Shankara Gayathri Radhakrishnan <sup>9</sup>, B. Ratna Sunil <sup>10</sup>, Ladislav Ducsay <sup>1</sup>

**Table S1.** Basic values of electrical conductivity and the pH of applied nano-fertilizers compared to applied water as a control variant.

|                                                | Control Variant with Water | nano/macro-ZnPhos | Nano-Hap      |
|------------------------------------------------|----------------------------|-------------------|---------------|
| Electrical conductivity (mS.cm <sup>-1</sup> ) | 0.05 ± 0.001               | 1.309 ± 0.033     | 0.087 ± 0.001 |
| pH                                             | 7.39 ± 0.005               | 8.60 ± 0.001      | 8.56 ± 0.004  |

**Table S2.** Comparison of monthly temperature and precipitation characteristics during the vegetation season of 2022 with the long-term norm from 1991 to 2020.

| Month                     | 2022 (°C) | Normal 1991-2020 (°C) | Delta t | Characteristic     |
|---------------------------|-----------|-----------------------|---------|--------------------|
| <b>Air temperature</b>    |           |                       |         |                    |
| April                     | 9.95      | 11.4                  | -1.5    | Cold               |
| May                       | 18        | 16                    | 2.0     | Warm               |
| June                      | 22.97     | 19.6                  | 3.4     | Extraordinary warm |
| July                      | 24.35     | 21.7                  | 2.6     | Very warm          |
| August                    | 24.23     | 21.1                  | 3.1     | Extraordinary warm |
| September                 | 16.33     | 15.9                  | 0.4     | Normal             |
| <b>Precipitation (mm)</b> |           |                       |         |                    |
| April                     | 69.9      | 36                    | 194.2   | Very wet           |
| May                       | 30.8      | 59                    | 52.2    | Dry                |
| June                      | 53.53     | 59                    | 90.7    | Normal             |
| July                      | 14.3      | 65                    | 22.0    | Extraordinary dry  |
| August                    | 48        | 55                    | 87.3    | Normal             |
| September                 | 42.4      | 58                    | 73.1    | Dry                |

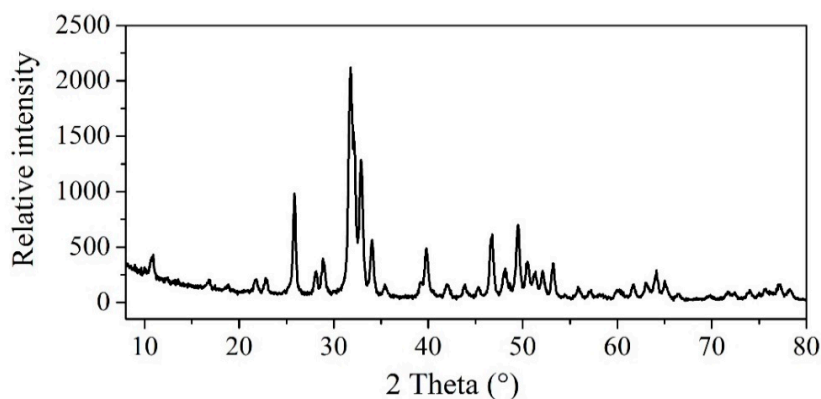

**Figure S1.** X-ray diffraction powder patterns of hydroxylapatite formed from Sheelavati fish bone.

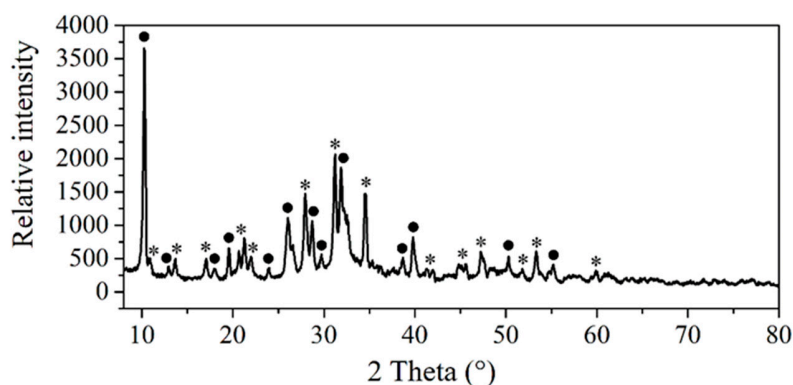

\* Parascholzite ● Calcium zinc phosphate

**Figure S2.** X-ray diffraction powder patterns the mixture of parascholzite and calcium zinc phosphate (nano/macro-ZnPhos) formed by chemical co-precipitation method.

**Table S3.** Abundance and dominance of the Coleoptera family in the studied treatments with sunflower at the Nitra-Dolná Malanta locality during vegetation season 2022.

| Family               | 1   | D1    | 2   | D2    | 3   | D3    | Σ   | D     |
|----------------------|-----|-------|-----|-------|-----|-------|-----|-------|
| <i>Anthicidae</i>    | 19  | 5.78  | 13  | 4.87  | 17  | 4.31  | 49  | 4.94  |
| <i>Carabidae</i>     | 276 | 83.89 | 222 | 83.15 | 339 | 85.82 | 837 | 84.46 |
| <i>Coccinellidae</i> | 4   | 1.22  | 2   | 0.75  | 3   | 0.76  | 9   | 0.91  |
| <i>Dermestidae</i>   | 13  | 3.95  | 4   | 1.50  | 11  | 2.78  | 28  | 2.83  |
| <i>Elateridae</i>    | 1   | 0.30  | -   | -     | 1   | 0.25  | 2   | 0.11  |
| <i>Latriidiidae</i>  | 1   | 0.30  | 3   | 1.12  | 2   | 0.51  | 6   | 0.60  |
| <i>Scarabaeidae</i>  | -   | -     | 3   | 1.12  | -   | -     | 3   | 0.31  |
| <i>Staphylinidae</i> | 15  | 4.56  | 20  | 7.49  | 22  | 5.57  | 57  | 5.75  |
| Σ                    | 329 | 100   | 267 | 100   | 395 | 100   | 991 | 100   |

1 - Control Variant (No Application); 2 - Nano-HAP (Foliar Applied Variant); 3 - Nano/macro-ZnPhos (Foliar Applied Variant); D1, D2, D3 – Dominance (%); D – Total dominance (%).

**Table S4.** Abundance and dominance of the *Carabidae* species in the studied treatments with sunflower at the Nitra-Dolná Malanta locality during vegetation season of 2022.

| Species                      | 1   | D1    | 2   | D2    | 3   | D3    | Σ   | D     |
|------------------------------|-----|-------|-----|-------|-----|-------|-----|-------|
| <i>Amara convexiuscula</i>   | -   | -     | 3   | 1.35  | -   | -     | 3   | 0.36  |
| <i>Brachinus crepitans</i>   | 9   | 3.26  | 12  | 5.41  | 11  | 3.24  | 32  | 3.82  |
| <i>Brachinus explodens</i>   | -   | -     | 1   | 0.45  | -   | -     | 1   | 0.12  |
| <i>Calathus fuscipes</i>     | 19  | 6.88  | -   | -     | 18  | 5.31  | 37  | 4.42  |
| <i>Harpalus affinis</i>      | -   | -     | 1   | 0.45  | -   | -     | 1   | 0.12  |
| <i>Poecilus cupreus</i>      | 7   | 2.54  | 10  | 4.50  | 4   | 1.18  | 21  | 2.51  |
| <i>Pseudoophonus rufipes</i> | 240 | 86.96 | 194 | 87.39 | 294 | 86.73 | 728 | 86.98 |
| <i>Pterostichus nigritya</i> | 1   | 0.36  | -   | -     | 12  | 3.54  | 13  | 1.55  |
| <i>Zabrus tenebrioides</i>   | -   | -     | 1   | 0.45  | -   | -     | 1   | 0.12  |
| Σ                            | 276 | 100   | 222 | 100   | 339 | 100   | 837 | 100   |

1 - Control Variant (No Application); 2 - Nano-HAP (Foliar Applied Variant); 3 - Nano/macro-ZnPhos (Foliar Applied Variant); D1, D2, D3 – Dominance (%); D – Total dominance (%).
